# Supplementary material
Source: publisher figshare collection journal article supplement (https://acs.figshare.com/ndownloader/files/12528695)
Supplement: Supplementary file 1 [file 12528695]

## Electronic Supplementary Information

### Calixarene intercalated NiCo Layered Double Hydroxide for enhanced oxygen evolution catalysis.

Babasaheb J. Waghmode<sup>\*†‡</sup>, Aarti P. Gaikwad<sup>||</sup>, Chandrashekhar V. Rode<sup>||</sup>, Shivaram D. Sathaye<sup>£</sup>, Kashinath R. Patil<sup>‡</sup> and Dipalee D. Malkhede<sup>†</sup>

<sup>†</sup>Centre for Advanced studies in Chemistry, Department of Chemistry, Savitribai Phule Pune University, Ganeshkhind Road, Pune-411007, India.

<sup>‡</sup>Centre for Materials Characterisation Division, CSIR-National Chemical Laboratory, Dr. Homi Bhabha Road, Pashan, Pune- 411008, India.

<sup>||</sup>Chemical Engineering and Process Development Division, CSIR-National Chemical Laboratory, Dr. Homi Bhabha Road, Pashan, Pune 411008, India.

<sup>£</sup>759/83 Deccan Gymkhana, Pune 411004, India.

---

Corresponding Author:

E mail:bwaghmode7@gmail.com

---

The number of pages (including cover page): 6 (S1-S6)

The number of Figures: 7 (Figures: S1-S7)

The number of Tabela: 3 (Table S1-S3)

#### Conversion of Hg/HgO to RHE

Hg/HgO electrode calibration was carried in a three electrode system with Pt wires as working and counter electrode and Hg/HgO as reference electrode. Hydrogen saturated 0.1 M KOH was used as an electrolyte. Linear sweep voltammetry was performed at 1 mV/s scan rate and the potential at which current crosses zero was taken as thermodynamic potential (vs Hg/HgO) for the hydrogen electrode. The potential at which current crosses zero is -0.949V vs Hg/HgO So  $E(\text{RHE}) = E(\text{Hg/HgO}) + 0.949$

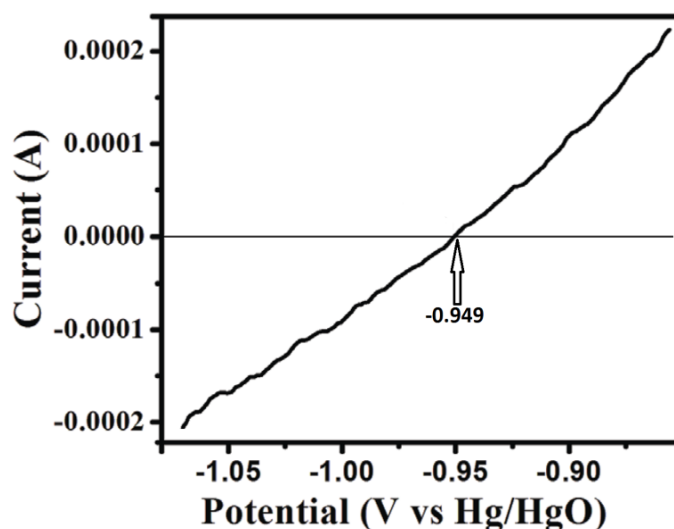

**Figure S1.** Calibration curve for reference electrode

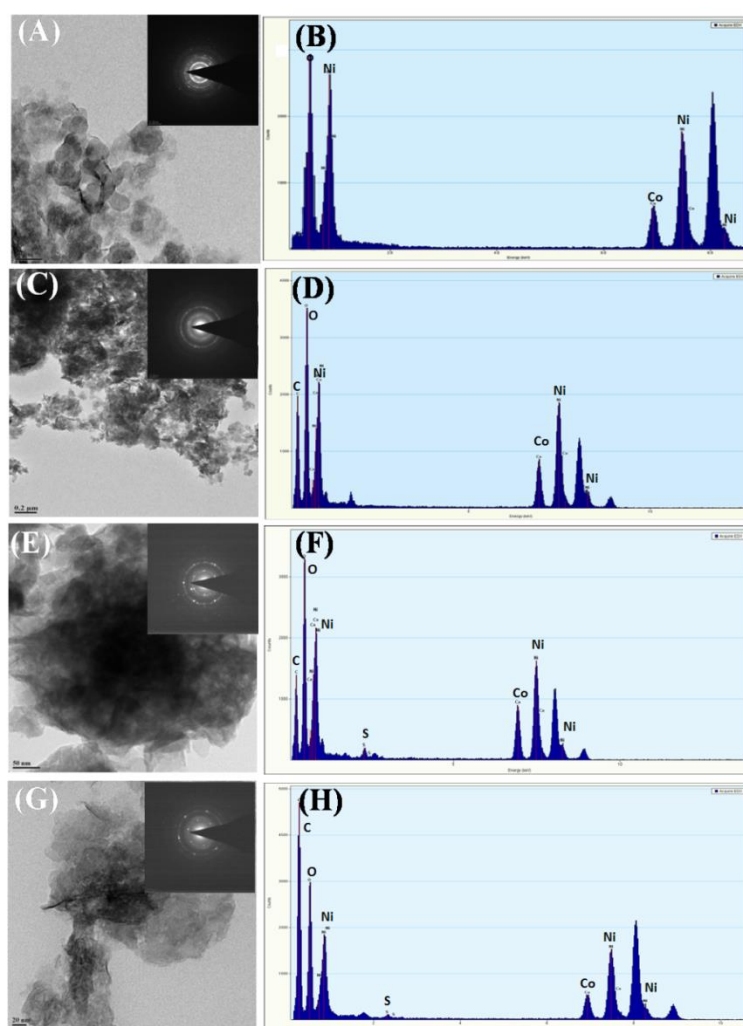

**Figure S2.** (A, C, E, and G) TEM micrograph and (B, D, F, and H) TEM-EDS of NiCo LDHs, CNO NiCo, CNO NiSO<sub>4</sub><sup>2-</sup>Co and CNONiSC4Co nanocomposite material.

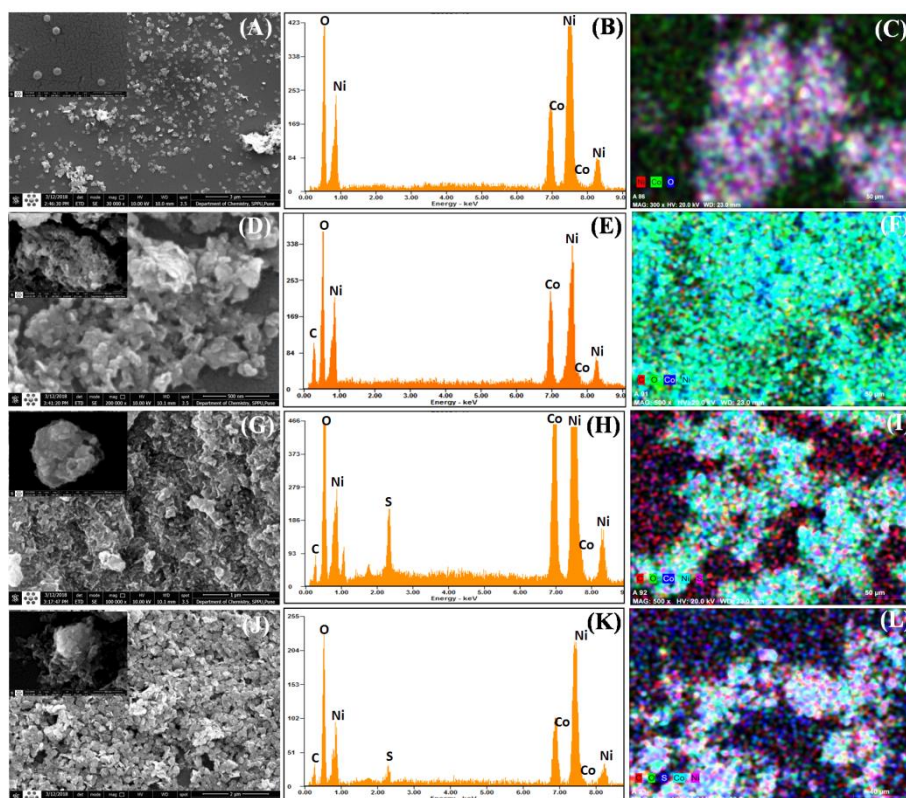

**Figure S3.** (A, D, G and J) SEM micrograph; (B, E, H and K) SEM-EDS; and (C, F, I and L) SEM-Elemental mapping of NiCo LDHs, CNO NiCo, CNO NiSO<sub>4</sub><sup>2-</sup>Co and CNONiSC4Co nanocomposite material.

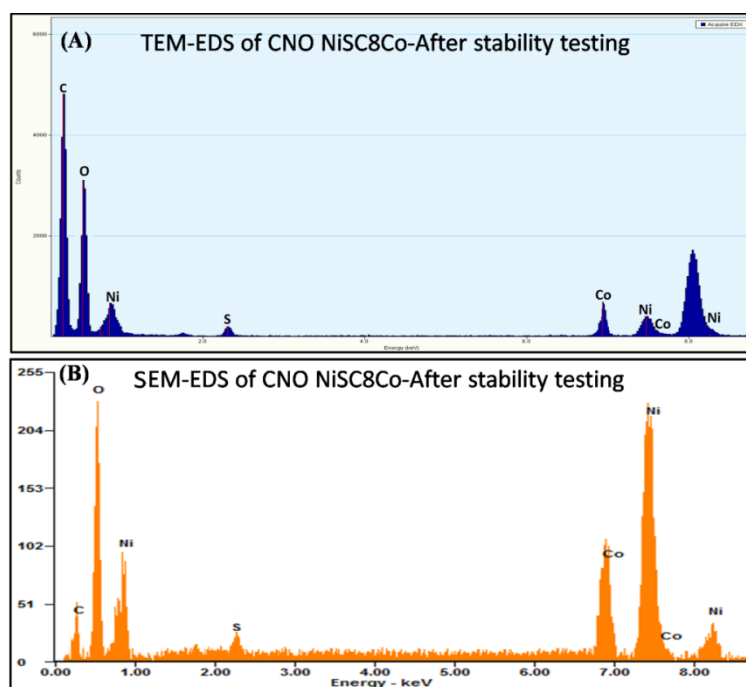

**Figure S4.** (A) TEM-EDS and (B) SEM-EDS of CNO NiSC8Co nanocomposite taken after OER.

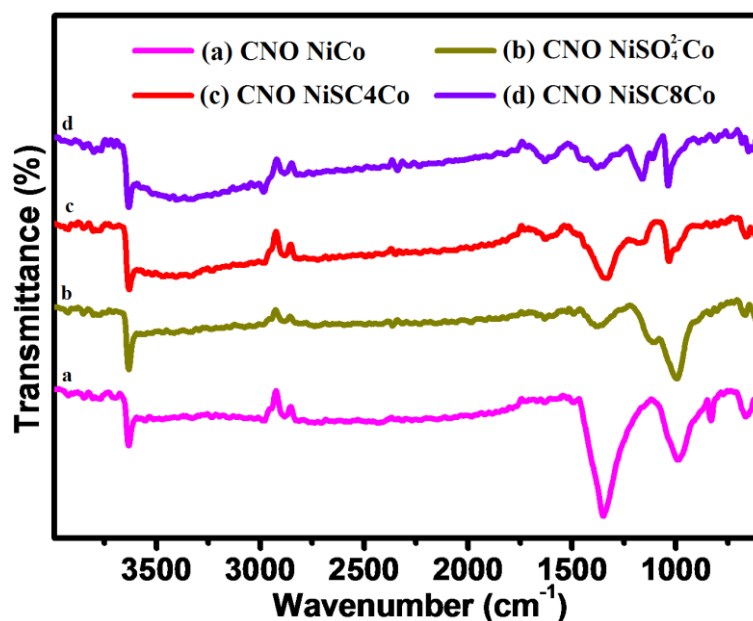

**Figure S5.** IR spectra of (a) CNO NiCo, (b) CNO NiSO<sub>4</sub><sup>2-</sup>Co, (c) CNO NiSC<sub>4</sub>Co, and (d) CNO NiSC<sub>8</sub>Co electrocatalysts.

**Table S1:** Atomic percentage of elements obtained from TEM-EDS and SEM-EDS (From initial and after OER CNO NiSC<sub>8</sub>Co nanocomposite).

| Sr. No.  | TEM-EDS                                                  |         |          |          | Sr. No.  | SEM-EDS                                                  |         |          |          |
|----------|----------------------------------------------------------|---------|----------|----------|----------|----------------------------------------------------------|---------|----------|----------|
|          |                                                          | Element | Weight % | Atomic % |          |                                                          | Element | Weight % | Atomic % |
| <b>1</b> | <b>CNO NiSC<sub>8</sub>Co</b>                            | C(K)    | 40.96    | 60.04    | <b>1</b> | <b>CNO NiSC<sub>8</sub>Co</b>                            | C(K)    | 6.50     | 12.37    |
|          |                                                          | O(K)    | 27.69    | 30.47    |          |                                                          | O(K)    | 49.21    | 70.31    |
|          |                                                          | S(K)    | 0.37     | 0.20     |          |                                                          | S(K)    | 0.26     | 0.19     |
|          |                                                          | Ni(K)   | 23.30    | 6.99     |          |                                                          | Ni(K)   | 32.18    | 12.53    |
|          |                                                          | Co(K)   | 7.66     | 2.28     |          |                                                          | Co(K)   | 11.84    | 4.59     |
|          |                                                          |         |          |          |          |                                                          |         |          |          |
| <b>2</b> | <b>CNO NiSC<sub>8</sub>Co (Afterer 30 h anodisation)</b> | C(K)    | 27.10    | 44.69    | <b>2</b> | <b>CNO NiSC<sub>8</sub>Co (Afterer 30 h anodisation)</b> | C(K)    | 05.73    | 13.15    |
|          |                                                          | O(K)    | 33.78    | 41.83    |          |                                                          | O(K)    | 40.74    | 65.06    |
|          |                                                          | S(K)    | 1.02     | 0.63     |          |                                                          | S(K)    | 03.98    | 0.61     |
|          |                                                          | Ni(K)   | 24.45    | 8.25     |          |                                                          | Ni(K)   | 33.02    | 14.09    |
|          |                                                          | Co(K)   | 13.63    | 4.58     |          |                                                          | Co(K)   | 16.52    | 07.03    |
|          |                                                          |         |          |          |          |                                                          |         |          |          |

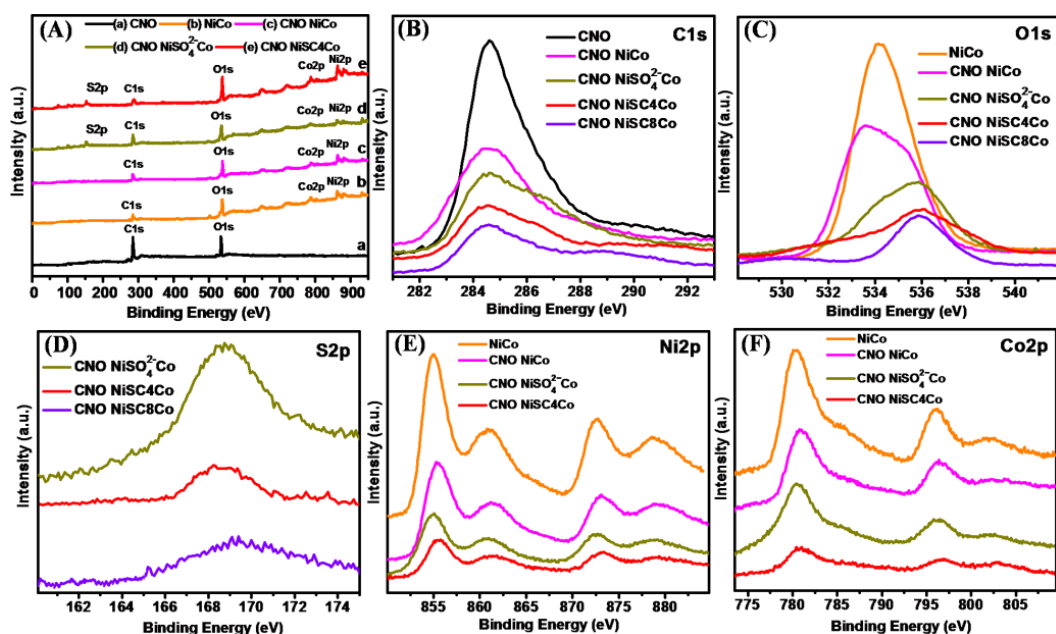

**Figure S6.** Comparative (A) XPS survey scan, (B) C1s, (C) O1s, (D) S2p, (E) Ni2p, and (F) Co2p spectra of CNO, NiCo LDHs and its respective nanocomposites.

**Table S2:** XPS analysis with species moieties of elements and its atomic percentage of initial and after OER, CNO NiSC8Co nanocomposites.

| Sr. No. | Sample Name                                 | Element present | Atomic % |
|---------|---------------------------------------------|-----------------|----------|
| 1       | CNONiSC8Co                                  | C               | 23.86    |
|         |                                             | O               | 63.42    |
|         |                                             | S               | 0.19     |
|         |                                             | Ni              | 9.25     |
|         |                                             | Co              | 3.25     |
|         |                                             |                 |          |
| 2       | CNONiSC8Co<br>(Afterer 30 h<br>anodisation) | C               | 38.16    |
|         |                                             | O               | 51.48    |
|         |                                             | S               | 0.60     |
|         |                                             | Ni              | 6.61     |
|         |                                             | Co              | 3.13     |

**Table S3** Comparison of electrocatalytic performance of the previously reported LDH based electrocatalysts for overall water splitting.

| Sr. No. | Catalyst                              | Over potential (mV) | Tafel slope (mV dec <sup>-1</sup> ) | Electrolyte | Reference                                            |
|---------|---------------------------------------|---------------------|-------------------------------------|-------------|------------------------------------------------------|
| 1       | Exfoliated Ni-Fe                      | 300 mV              | 40 mV dec <sup>-1</sup>             | 1 M KOH     | <i>Nat. Commun.</i> <b>2014</b> , 5, 4477.           |
| 2       | Ni-Co-OH                              | 337 mV              | -                                   | 1 M NaOH    | <i>Nano Lett.</i> <b>2015</b> , 15, 2498.            |
| 3       | Exfoliated Ni-Co                      | 367 mV              | 40 mV dec <sup>-1</sup>             | 1 M KOH     | <i>Nano Lett.</i> <b>2015</b> , 15, 1421.            |
| 4       | Ultrathin Co-Mn LDH                   | 324 mV              | 43 mV dec <sup>-1</sup>             | 1 M KOH     | <i>J. Am. Chem. Soc.</i> <b>2014</b> , 136, 16481.   |
| 5       | NiFe-Bi CC                            | 363 mV              | -                                   | 0.5 M K-Bi  | <i>ACS Appl. Mater. Int.</i> <b>2017</b> , 9, 19502. |
| 6       | CoMn-LDH/MWCNT                        | 300 mV              | 74 mV dec <sup>-1</sup>             | 1 M KOH     | <i>ACS Appl. Mater. Int.</i> <b>2016</b> , 8, 14527. |
| 7       | ultrathin Co-Fe LDH                   | 300 mV              | 47 mV dec <sup>-1</sup>             | 1 M KOH     | <i>ACS Appl. Mater. Int.</i> <b>2016</b> , 8, 34474. |
| 8       | Fe-Ni nanoparticles                   | 311 mV              | -                                   | 1 M NaOH    | <i>ACS Catal.</i> <b>2016</b> , 7, 365.              |
| 9       | Co-Cr LDH (2:1)                       | 340 mV              | 81 mV dec <sup>-1</sup>             | 0.1 M NaOH  | <i>J. Mater. Chem. A</i> <b>2016</b> , 4, 11292.     |
| 10      | Ni-Fe(8:2)/3D                         | 259 mV              | 39 mV dec <sup>-1</sup>             | 1 M KOH     | <i>J. Mater. Chem. A</i> <b>2015</b> , 3, 6921.      |
| 11      | Ni-Fe LDH/N-Gr                        | 337 mV              | 45 mV dec <sup>-1</sup>             | 0.1 M KOH   | <i>Adv. Mater.</i> <b>2015</b> , 27, 4516.           |
| 12      | Ni <sub>0.6</sub> Co <sub>1.4</sub> P | 300 mV              | 80 mV dec <sup>-1</sup>             | 1 M KOH     | <i>Adv. Funct. Mater.</i> <b>2018</b> , 1706008      |
| 13      | 3D NNCNTAs                            | 460 mV              | 65 mV dec <sup>-1</sup>             | 0.1 M KOH   | <i>Adv. Funct. Mater.</i> <b>2014</b> , 24, 4698.    |
| 14      | Co-Fe LDH (1:0.35)                    | 350 mV              | 49 mV dec <sup>-1</sup>             | 1 M NaOH    | <i>Chem Sus Chem</i> <b>2017</b> , 10, 156.          |
| 15      | Fe-Ni hydroxide                       | 320 mV              | 57 mV dec <sup>-1</sup>             | 1 M KOH     | <i>Chem Sus Chem</i> <b>2016</b> , 9, 1835.          |
| 16      | NiCo LDH                              | 420 mV              | 113 mVdec <sup>-1</sup>             | 0.1 M KOH   | <i>J. Power Sources</i> <b>2015</b> , 278, 445.      |
| 17      | ZnCo LDH/graphene                     | 430 mV              | 73 mV dec <sup>-1</sup>             | 0.1 M KOH   | <i>Dalton Trans.</i> <b>2014</b> , 43, 15119.        |
| 18      | Co-Fe LDH/rGO                         | 340 mV              | 43 mV dec <sup>-1</sup>             | 0.1 M KOH   | <i>Adv. Mater. Int.</i> <b>2016</b> , 3, 1500782.    |

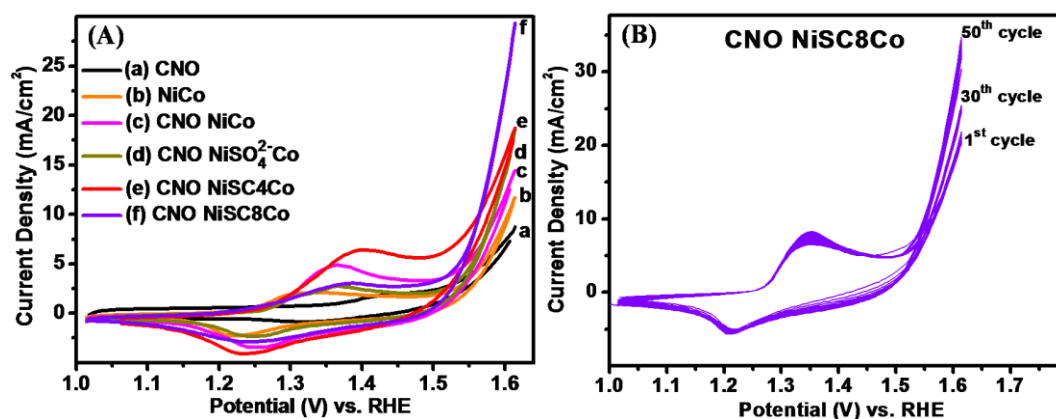

**Figure S7.** (A) CV of CNO, NiCo, CNO NiCo, CNO NiSO<sub>4</sub><sup>2-</sup>Co, CNO NiSC<sub>4</sub>Co, and CNO NiSC<sub>8</sub>Co electrocatalysts at 50 mv scan rate, (B) CV of CNO NiSC<sub>8</sub>Co electrocatalysts 1<sup>st</sup> cycle to 50<sup>th</sup> cycle.
